# Supplementary material for: Production, Characterization, and Functional Properties of Protein Concentrate from Momordica cochinchinensis Seeds
Source: Research Square preprint supplement (doi:10.21203/rs.3.rs-7881609/v1), 2025-12-03
Supplement: Supplementary file 1 [file 625d450dcf62b305399a00fc.docx]

**Production, Characterization, and Functional Properties of Protein Concentrate from Momordica cochinchinensis Seeds**

Anh Van Nguyen1, Khanh Kim Nguyen1, Uyen Nguyen Thao Le1, Anh Minh Tran1, Binh Cong Nguyen1, Hoai Thi Ngoc Nguyen1, Anh Thi Ngoc Vu2,3*

1 Faculty of Food Science and Technology, Ho Chi Minh City University of Industry and Trade, Ho Chi Minh City, Viet Nam

2 Laboratory of Advanced Materials Chemistry, Institute for Advanced Study in Technology, Ton Duc Thang University, Ho Chi Minh City, Vietnam

3 Faculty of Applied Sciences, Ton Duc Thang University, Ho Chi Minh City, Viet Nam

Corresponds to: [vuthingocanh@tdtu.edu.vn](mailto:vuthingocanh@tdtu.edu.vn)


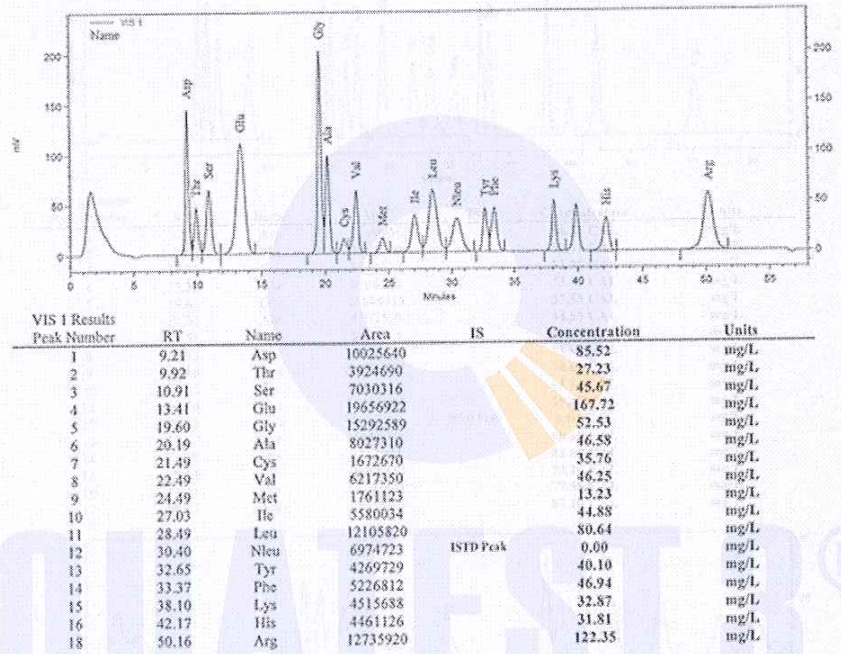


Fig S1. Chromatogram of amino acid contents in MCPC

Fig S2. Trolox calibration curve

Table S1. Antioxidant capacity of MCPC

| **Protein sample concentration**  **(µg/mL)** | **TEAC**  **(µg Trolox/mL)** |
| --- | --- |
| 50 | 9.05±0.20 |
| 100 | 17.89±0.23 |
| 150 | 21.69±0.29 |
| 200 | 23.63±0.19 |
